# Supplementary material
Source: publisher site journal article supplement (https://www.spandidos-publications.com/49/downloadSupplementary)
Supplement: Supplementary file 1 [file downloadSupplementary]

Video S1. Live image of spontaneously beating cardiomyocyte-like cells derived from hair follicle cells. Bar, 100  $\mu$ m.
